# Supplementary material
Source: PubMed Central journal article supplement (PMC2718748)
Supplement: me.2009-0024_7.pdf [file me.2009-0024_7.pdf]

**Supplemental table 1**

|                        |                                                                                                                                                                               | <b>Forward</b>                                                                                                                                                                                                                                                                                                                                                                                                                                                                                                      | <b>Reverse</b>                                                                                                                                                                                                                                                                                                                                                                                                                | <b>Source</b>          |
|------------------------|-------------------------------------------------------------------------------------------------------------------------------------------------------------------------------|---------------------------------------------------------------------------------------------------------------------------------------------------------------------------------------------------------------------------------------------------------------------------------------------------------------------------------------------------------------------------------------------------------------------------------------------------------------------------------------------------------------------|-------------------------------------------------------------------------------------------------------------------------------------------------------------------------------------------------------------------------------------------------------------------------------------------------------------------------------------------------------------------------------------------------------------------------------|------------------------|
| <b>cloning primers</b> |                                                                                                                                                                               |                                                                                                                                                                                                                                                                                                                                                                                                                                                                                                                     |                                                                                                                                                                                                                                                                                                                                                                                                                               |                        |
| Lentiviral cloning     | ERRα<br>hNF4α                                                                                                                                                                 | TGAGCATCCCAGGCTTCTCGTTCAAGAGATGAGAAGCCTGGGATGCTCTTTTTC<br>TGATCAGCACTCGAAGGTGCTTCAAGAGATGACCTTCGAGTGCTGATCTTTTTC                                                                                                                                                                                                                                                                                                                                                                                                    | TCGAGAAAAAAGAGCATCCCAGGCTTCTCATCTCTTGAACGAGAAGCCTGGGATGCTCA<br>TCGAGAAAAAAGATCAGCAACTCGAAGGTCTATCTCTTGAACGACCTTCGAGTGCTGATCA                                                                                                                                                                                                                                                                                                  | Sladek et al, 1997     |
| DR1 mutagenesis        | -2032 DR1<br>-878 DR1                                                                                                                                                         | TGATTATTTCCCATGATCAGTCTCGTTGTA<br>ATTGCAAAAGCAAGACTACCGATAAAG                                                                                                                                                                                                                                                                                                                                                                                                                                                       | AAAAACACCTTCTGGGTAGGGAAGATAATT<br>TTGTTTTTCCCTCAGAAGCATGTGATCTT                                                                                                                                                                                                                                                                                                                                                               |                        |
|                        | hHNF4α2                                                                                                                                                                       | tattagaattcAGAATGCGACTCTCCAAAACC                                                                                                                                                                                                                                                                                                                                                                                                                                                                                    | tatactctagaCAGCGGCTTGCTAGATAACTTC                                                                                                                                                                                                                                                                                                                                                                                             | NM_000457              |
| <b>qPCR primers</b>    | human 36B4<br>human CYP17A1<br>human CYP11A1<br>human CYP21<br>human CYP11B1<br>human 3βHSD1<br>human 3βHSD2<br>rat cyclophilin A<br>rat Pgc-1α<br>rat Cyp17A1<br>rat Cyp11A1 | GGACATGTTGCTGGCCAATAA<br>CCGTAAGGGTATCGCCTTCG<br>ACCAGAGACCCATAGGAGTCC<br>CTCCACCTCCCGCTCTTG<br>GGGTGGCCCTACAGACAACATC<br>TGACAGGAGCAGGAGGGTTTC<br>GAACGGCCAGGAAAGAG<br>aaggtgaagagagcagtagca<br>ATGAGAAGCGGAGCTGAA<br>TTTCCCAACAAAGGCTTGAGGTTG<br>TCCTCAAAGCCAGCATCAAGGAGA                                                                                                                                                                                                                                         | GGGCCGAGACCAGTGT<br>GATGTCTATGGACTGCGGTTG<br>CAACAGGGGAAAAAGTTCTTG<br>AGTTCAGCACCACCACATCTTG<br>GGCGACAGCACTTCTGGATT<br>CAGCGGGTGTGGATGATGAC<br>TGGCTCTTAAACCCCAAGTGT<br>agttgtccacagtcggagatg<br>CGGGTCTCAGTCTGTGCC<br>AATCAGAATGTCGTCAGGCTGGA<br>TACGAAGCACCAGGTCGTTACAA                                                                                                                                                    |                        |
| <b>Chip primers</b>    | ERRα promoter<br>ERREs for CYP11A1                                                                                                                                            | CCATCCGAGTGGAAATTTGAGTCTAAAG<br>-9298 TGCCCTTTCACCTACAGCAGA<br>-8650 TCTGACCTACCTGCCTGAT<br>-1546 CGTAGACACTGCCTTCTT<br>-873 GGGTATGAAAGGAGCTCTGA<br>-264 GCACAGGCAGATTTTCAGGA<br>1480 GGGAGGGAGATTTGAAGTCC<br>15235 GCTCATGCCGTAATCCAGTGC<br>19455 TGTGGACAGGTGAGAAAGCTG<br>24042 TTCTCGGCTGTGCTCTCCT<br>24348 GAGGGCAAAGGACCAAGTGT<br>25789 GAGGCAGCAGGTGGAACG<br>26180 AGTGACAGAGGAAAGCAGCT<br>26646 CCAGGAAAGGACCTAGCG<br>28661 GTCTCAATGAAGGCAAGAG<br>34696 GGAGACCTCGGGAAGCTTAG<br>38065 CTCACGCTACTGAGAACCCA | GAACCGTAGACCAGTAGCCCCACAGAG<br>ATCCCTCCCGAAGACACACT<br>GGCTCTTAAAGGCCAGTTCG<br>GAGTGGTGTGTGCTCTTCC<br>GACCTTGGCAATCTGCTTG<br>AATTTCTGCAGCGTGGGTT<br>GGAGGAATGCTGGGTTCTGT<br>CTG CCT CAG CCT CTT AAG AAG CT<br>GACCAGCAAGTCCCTCACTC<br>TTGACATAGCGTGGGACAAA<br>CATACCTGACGAGGCTTCT<br>TTTTGCAGTGGCAGGTTGCT<br>CTCTCTCTCTCTGGCAACAG<br>TACATGGAGTGGCACACAGC<br>CTCAGAACCCAGCAATCAT<br>CCCAAAATCACCCATGGTA<br>GCCCAGTCACTTCCAAGT | Laganriere et al, 2004 |
| ERREs for CYP17A1      | -16617<br>-8555<br>72<br>1294<br>3292<br>9334<br>12177<br>14189<br>19307<br>22402<br>25324<br>25500                                                                           | CTTCGGCTTGTGCTCTT<br>ATGGGTGGTGAAGGAGTGT<br>GGTAAGCAGCAAGAGAGCCA<br>GCAGAGGTGGGAGCTAGGTA<br>CAGGTGCCAGTCTCTCCT<br>GAGAAGGAGGTGGAACCCA<br>AGCTGAGTGTGTAAGAGGGA<br>GCCACCAGAGGCTGATAGAA<br>CCACCAGTGTGCCAATC<br>TCTGTTGTGTGTGCTCA<br>GTACCCATCTGTCTCTGAT<br>AATAAGCCTTGGATGGCAGA                                                                                                                                                                                                                                      | GTCGCCATCTTTCAGTTAGC<br>AATCCAGATGATGACAATATTCCTT<br>TCCTTGTGCCCTAGAGTTGC<br>CAGCTTTGATGAAGCCAAGG<br>TTGCATTCTGGCTGAAGGTC<br>ACTGCCAGGTAAGGCTTCT<br>GAACCTTGACTCTCTGCCAA<br>CCTTGTGACAGGAGGGAAA<br>AGAGGTGAGTCTTAAGCAGATGG<br>TGTGTTTACGCTGGAGAGAA<br>TCCTCTAACCTTCCAATGC<br>CTACTGTGGCTGGAGGTTG                                                                                                                              |                        |
| DR1 sites for CYP17A1  | CYP7A promoter<br>14644<br>-878<br>-2032<br>-3542<br>-6837<br>-14075                                                                                                          | CCAGGTCCGAATGTTAAGTCA<br>CTTGGTTCCAGGTCAAGT<br>TGAAGGGAAGGGAGAGATA<br>CTTGCTCGTCTCTCGGTTT<br>GGTACGACGCCAGACTTGA<br>CACCTGAGCCTCAAACCAGC<br>CGATGGTGCCTACCTGTAGTCC                                                                                                                                                                                                                                                                                                                                                  | AAGTCCACAGGTATCAGAAGTGG<br>AACGATTCCTTCAGTCCCT<br>CTGCTGATGACCAAGAAGG<br>TGTTTTCTGTGTTAATCGGCTTG<br>CTC TCA CCT GGA TGG ATG CTC C<br>GCA CCG CTG AAC ATA GAC CC<br>GTT CAA TAT CAG CAG CCT GGG C                                                                                                                                                                                                                              |                        |
