# Supplementary material
Source: PubMed Central journal article supplement (PMC2718748)

# CYP11A1

# CYP17A1

A

Not expressed

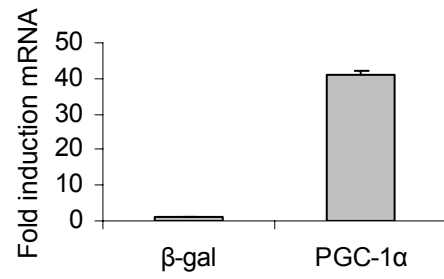

B

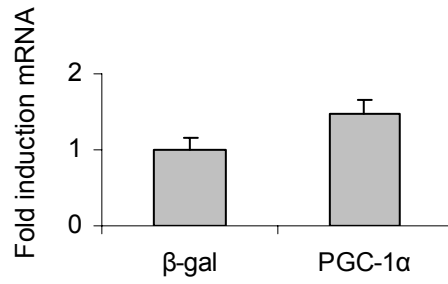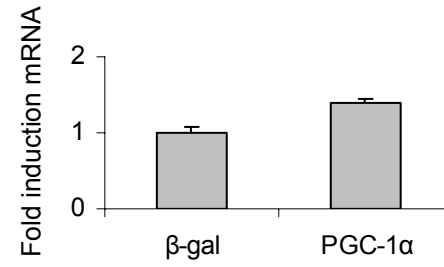

C

Not tested

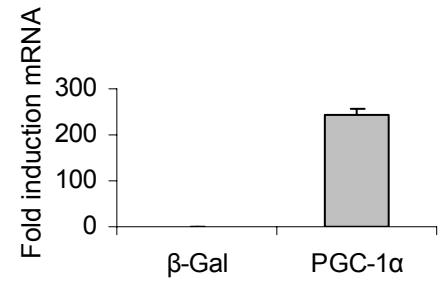

D

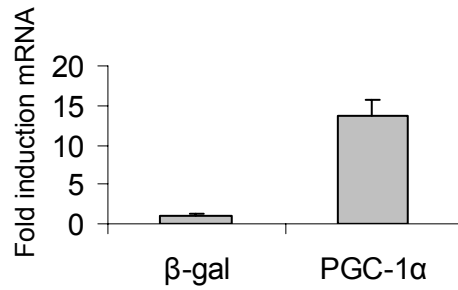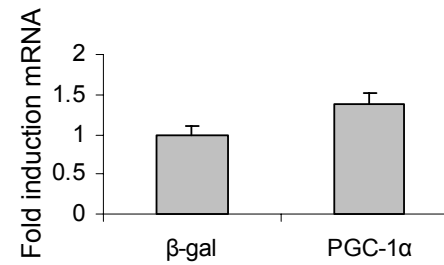

Supplemental Figure 1.

Supplement: me.2009-0024_1.pdf [file me.2009-0024_1.pdf]

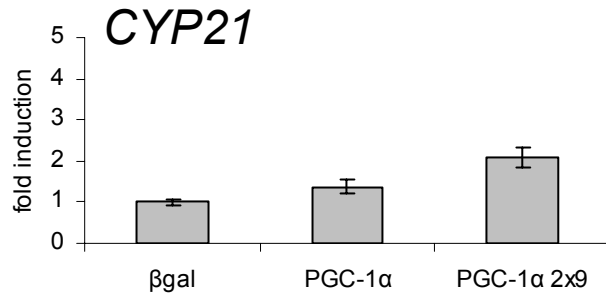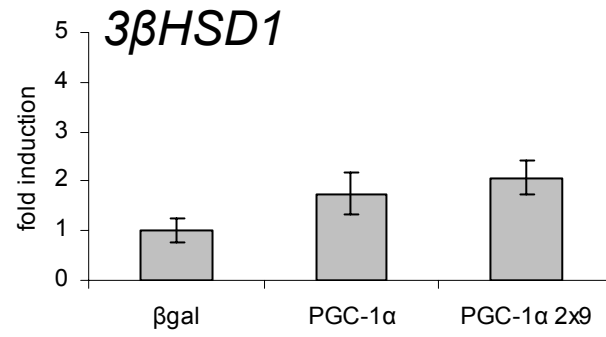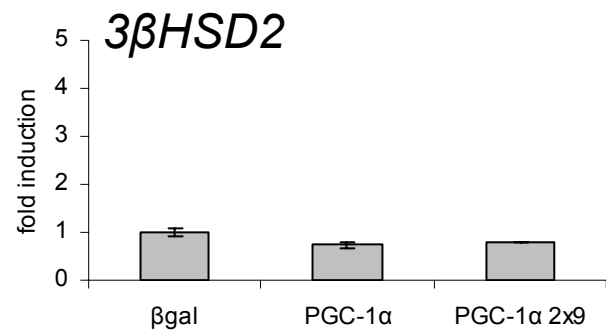

***CYP11B1***

Not expressed

**Supplemental Figure 2.**

Supplement: me.2009-0024_2.pdf [file me.2009-0024_2.pdf]

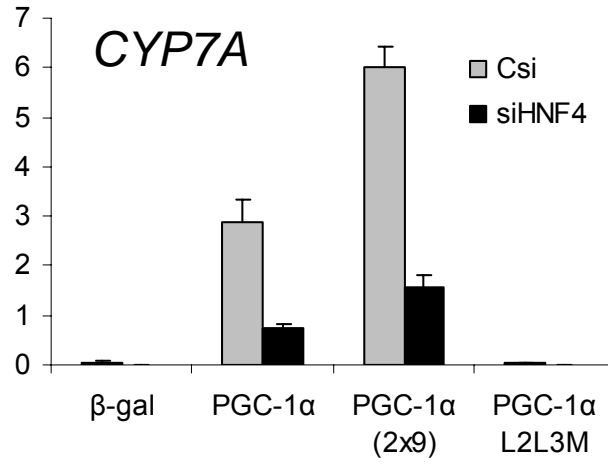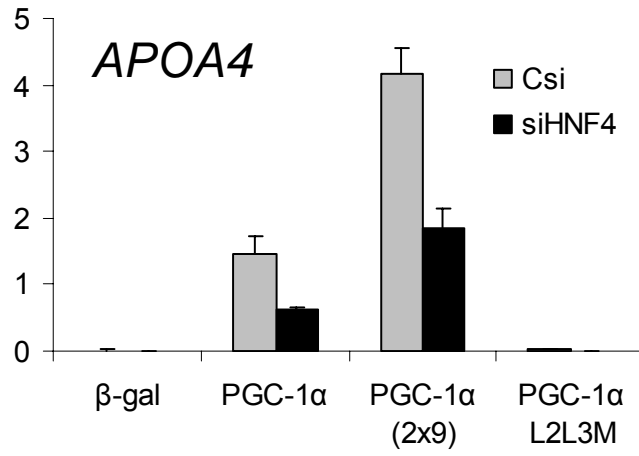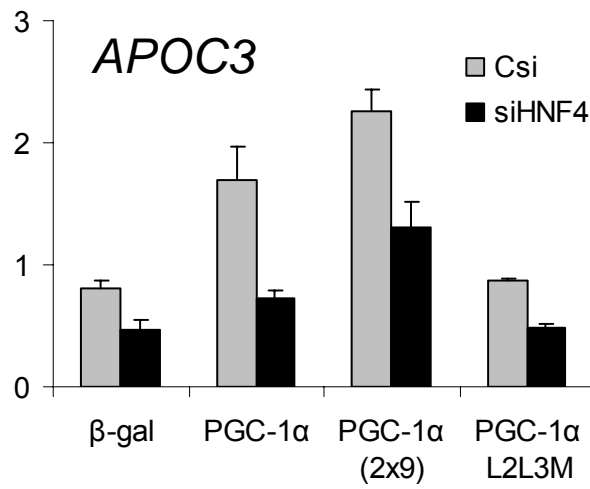

Supplemental Figure 3.

Supplement: me.2009-0024_3.pdf [file me.2009-0024_3.pdf]

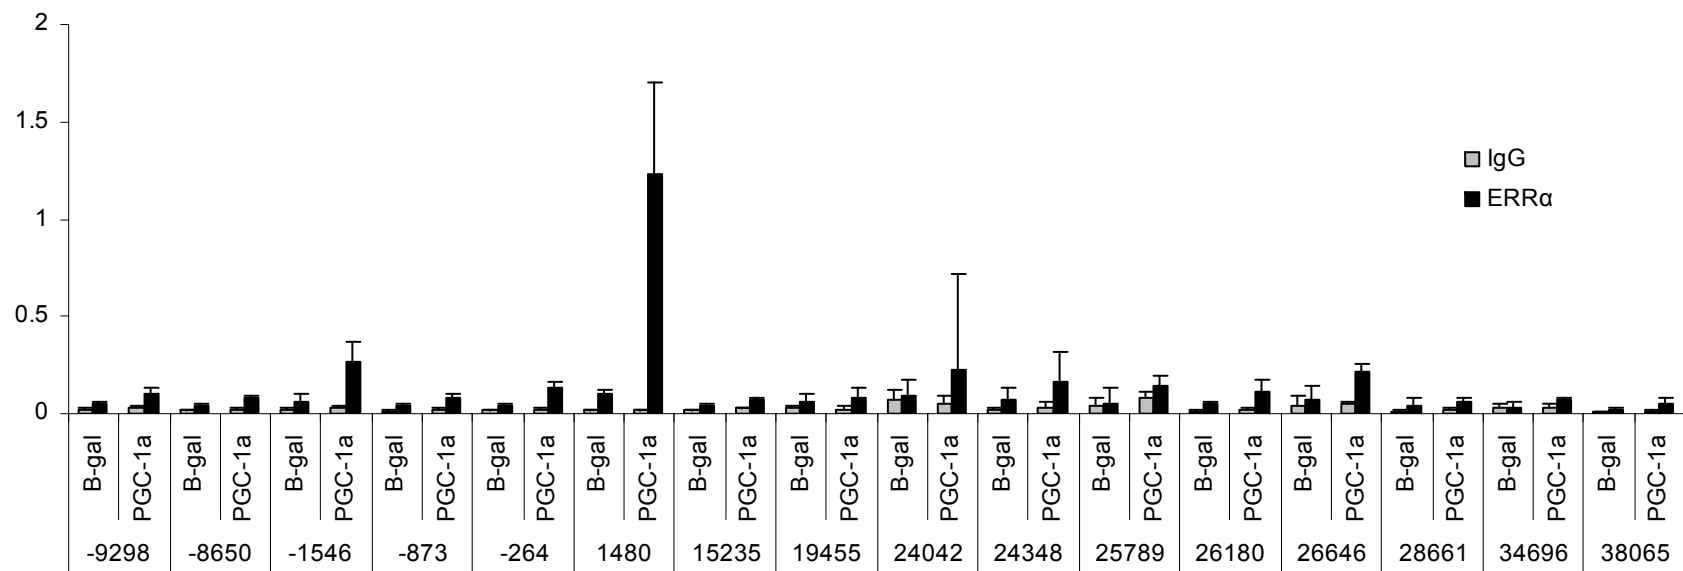

Supplemental Figure 4.

Supplement: me.2009-0024_4.pdf [file me.2009-0024_4.pdf]

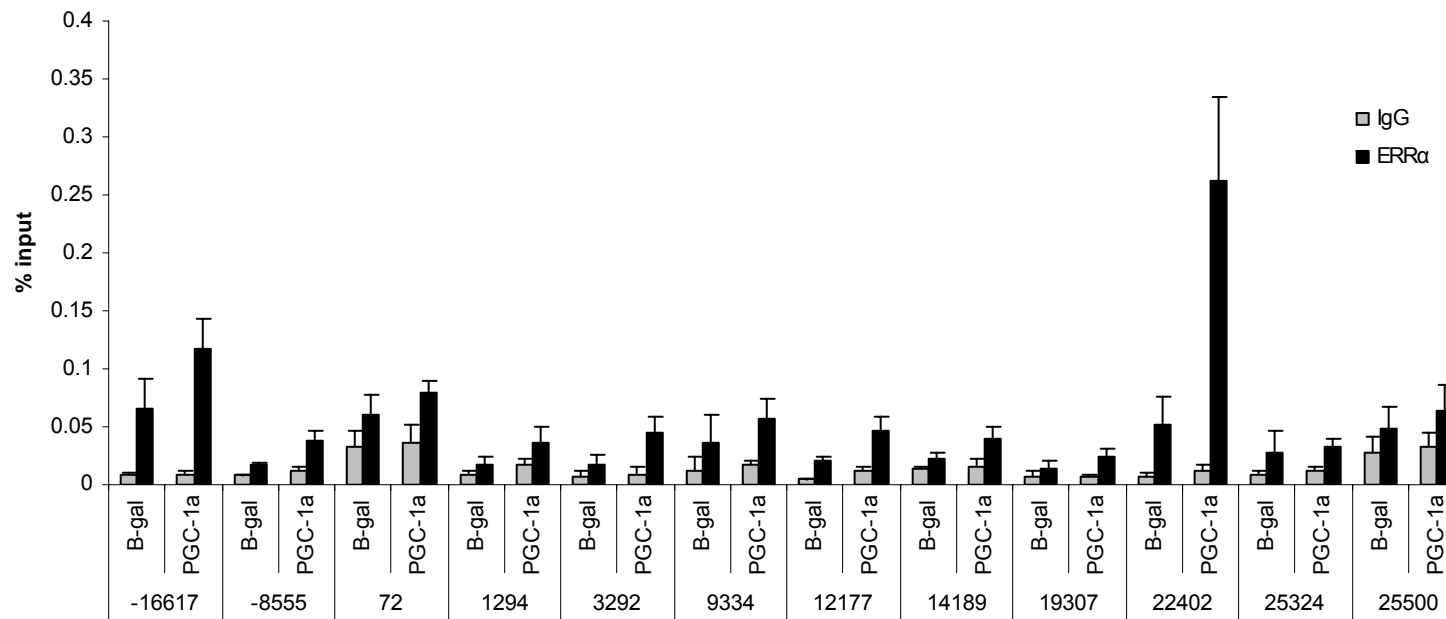

Supplemental Figure 5.

Supplement: me.2009-0024_5.pdf [file me.2009-0024_5.pdf]

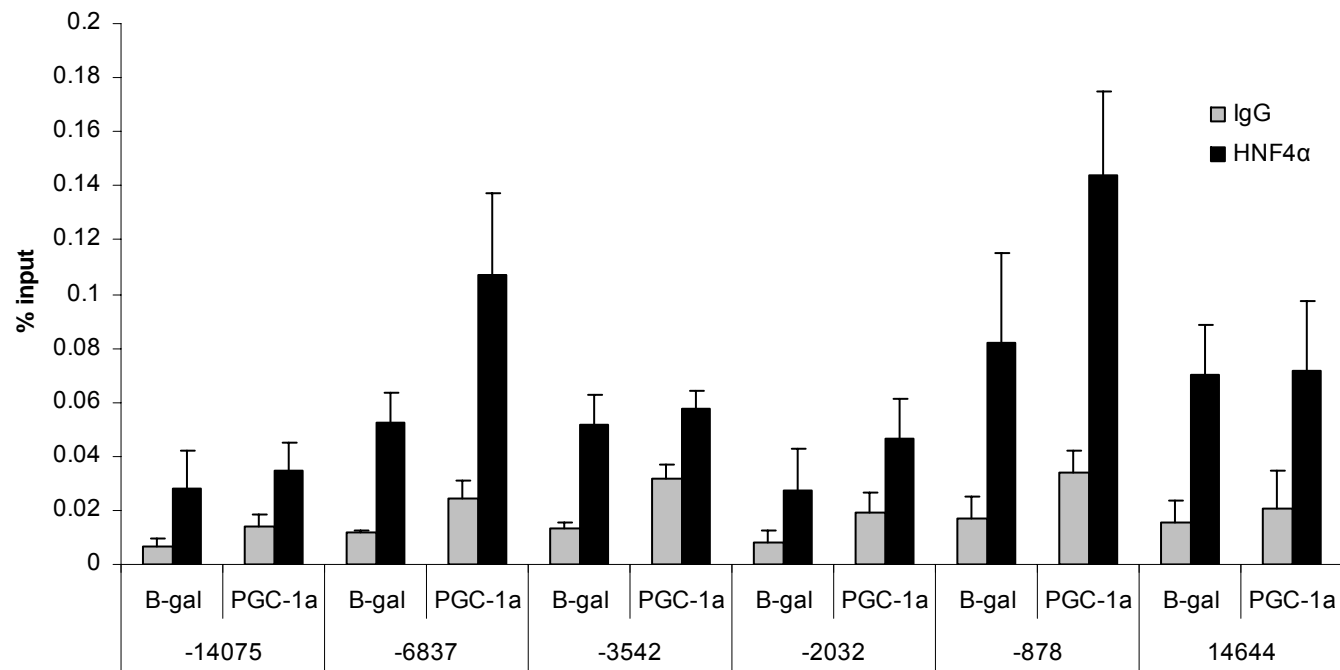

**Supplemental Figure 6.**

Supplement: me.2009-0024_6.pdf [file me.2009-0024_6.pdf]
